# Supplementary material
Source: publisher figshare collection journal article supplement (https://frontiersin.figshare.com/ndownloader/files/16107191)
Supplement: Supplementary file [file 16107191]

Supplemental Table 1: Relevant Gene Descriptions

| Supplementary Table 1: Gene Descriptions |                                                                                                                                                                                                           |
|------------------------------------------|-----------------------------------------------------------------------------------------------------------------------------------------------------------------------------------------------------------|
| GENE                                     | Description                                                                                                                                                                                               |
| PAR2 (F2RL1)                             | GPCR activated by amino terminus cleavage by trypsin like proteases. Show to be important in blood flow, inflammatory response and innate/adaptive immune systems.                                        |
| SCF (KITLG)                              | Ligand (KIT Ligand) of the tyrosine-kinase receptor. Pleiotropic factor involved in hematopoietic precursor stem cell development and mast cell migration/development specifically.                       |
| VEGFA                                    | Growth factor promoting vascular endothelial cell migration and proliferation. Essential for normal and pathological angiogenesis.                                                                        |
| NGF                                      | Growth factor regulating growth and proper differentiation of sensory neurons.                                                                                                                            |
| IL-1B                                    | Proprotein (proteolytic activation) cytokine associated with immune response. Important mediator proliferation, apoptosis, and both normal inflammatory responses and inflammatory pain hypersensitivity. |
| IL-6                                     | Cytokine involved in inflammatory response in acute and chronic conditions. Ability of endogenous pyrogen activity in autoimmune responses.                                                               |
| MMP3                                     | Proteolytically activated proproteins involved in breakdown of extracellular matrix (various collagens and proteoglycans) during tissue remodeling responses in normal and pathological physiology.       |
| MMP13                                    | Member of same matrix metalloproteinase family as MMP3 and as relevant to study functions as described above for MMP3.                                                                                    |
